# Supplementary material for: Oxycodone-Related Deaths: The Significance of Pharmacokinetic and Pharmacodynamic Drug Interactions
Source: PubMed Central journal article supplement — Eur J Drug Metab Pharmacokinet. 2022 Jan 13;47(2):259–70. doi: 10.1007/s13318-021-00750-9 (PMC8917044; doi:10.1007/s13318-021-00750-9), 2022-01-13

# Oxycodone-related deaths: The significance of pharmacokinetic and pharmacodynamic drug interactions.

European Journal of Drug Metabolism and Pharmacokinetics

**Gerd Jakobsson<sup>1,2</sup>, Sara Gustavsson<sup>1</sup>, Anna K Jönsson<sup>1,2</sup>, Johan Ahlner<sup>2</sup>, Henrik Gréen<sup>1,2</sup>, and Robert Kronstrand<sup>1,2</sup>**

<sup>1</sup> Department of Forensic Genetics and Forensic Toxicology, National Board of Forensic Medicine, 587 58 Linköping, Sweden

<sup>2</sup> Division of Clinical Chemistry and Pharmacology, Department of Biomedical and Clinical Sciences, Linköping University, 581 83 Linköping, Sweden

**Corresponding author:** [gerd.jakobsson@liu.se](mailto:gerd.jakobsson@liu.se)

Supplemental figure. Cases (%) with one or several co-findings of pharmacodynamically interacting drugs in femoral blood, separated by the groups INTOX and NONINTOX

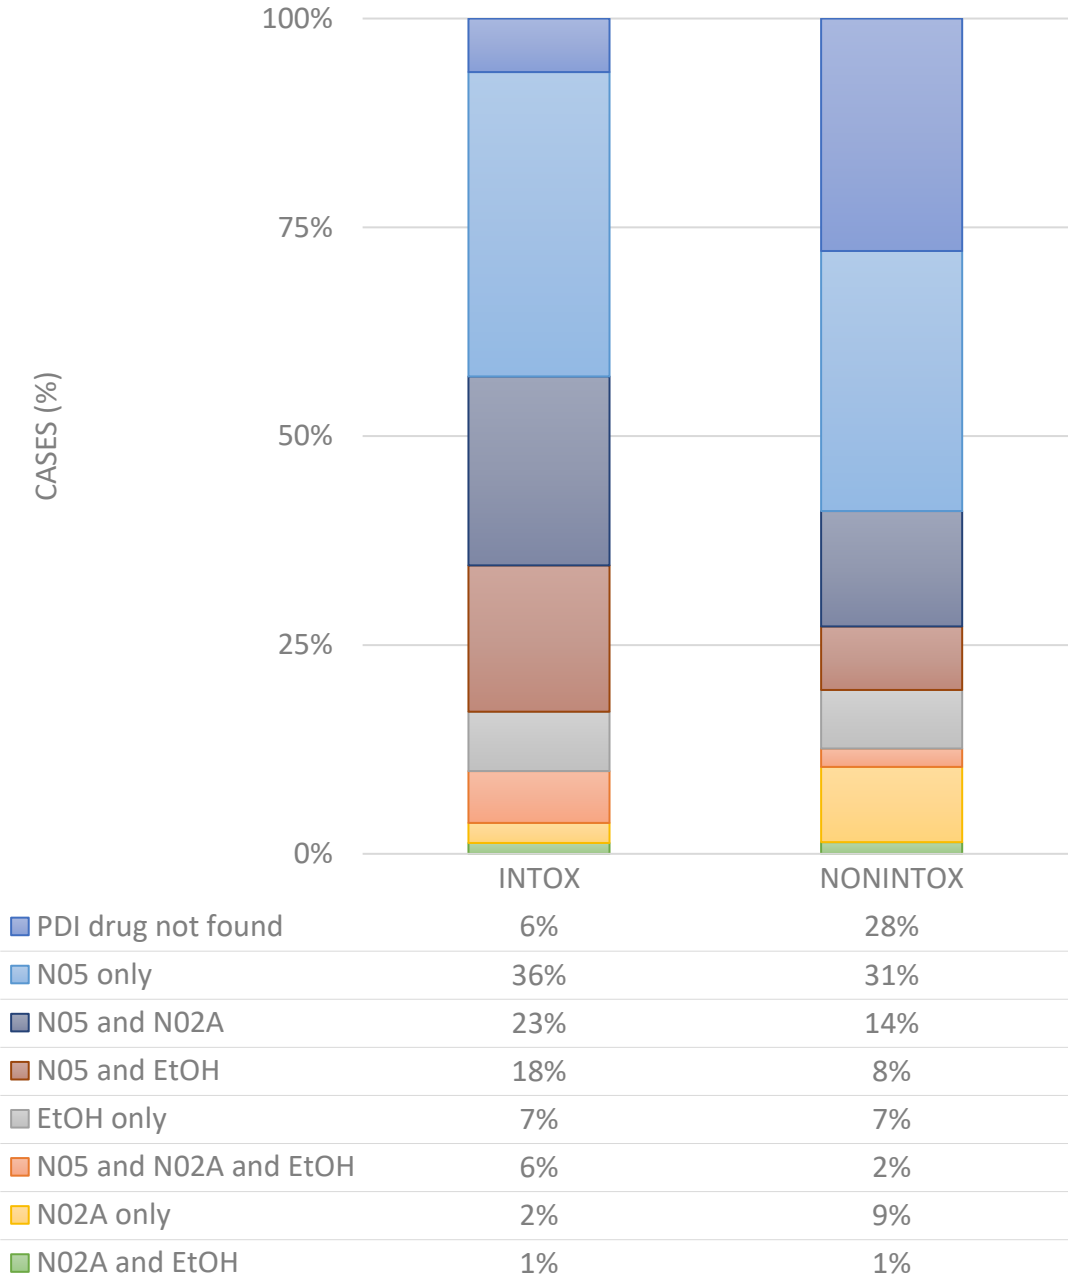

Supplement: 13318_2021_750_MOESM1_ESM.pdf [file 13318_2021_750_MOESM1_ESM.pdf]
